# Supplementary material
Source: PubMed Central journal article supplement (PMC2858972)

Supplemental Material consists of three Figures and two Movies. Captions for these have been included at the end of the submitted manuscript.

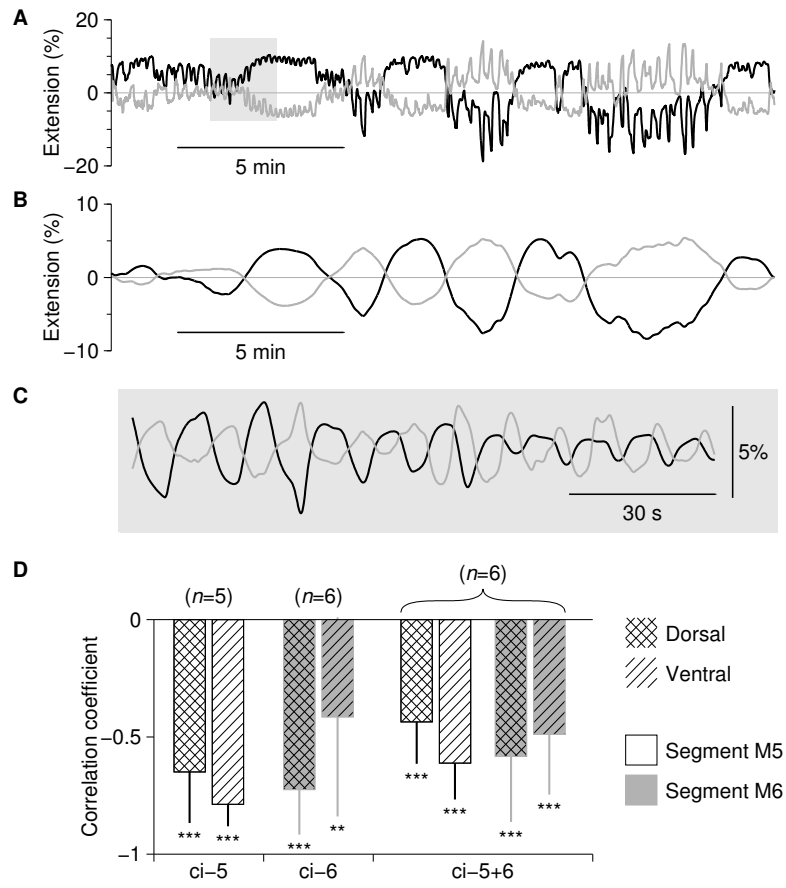

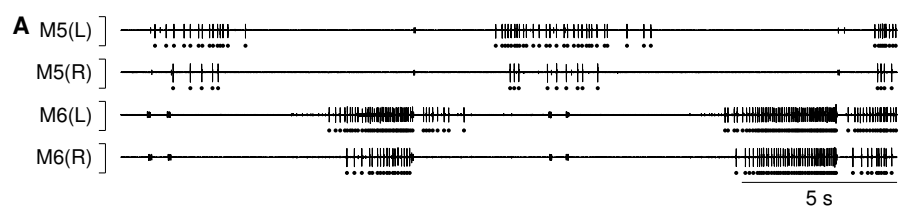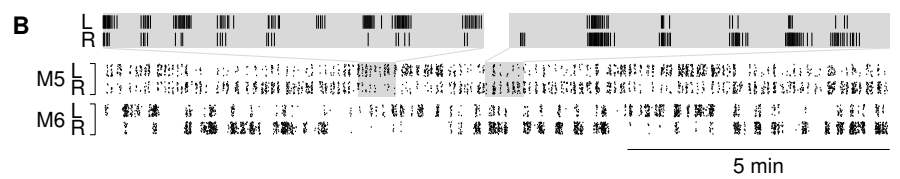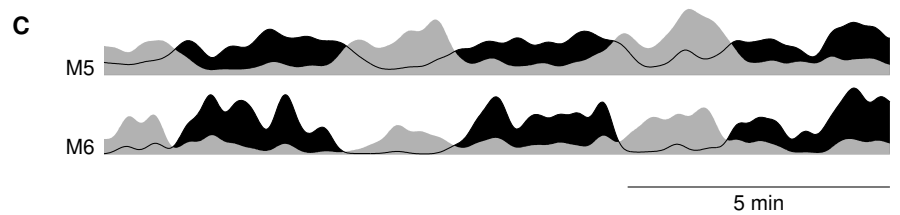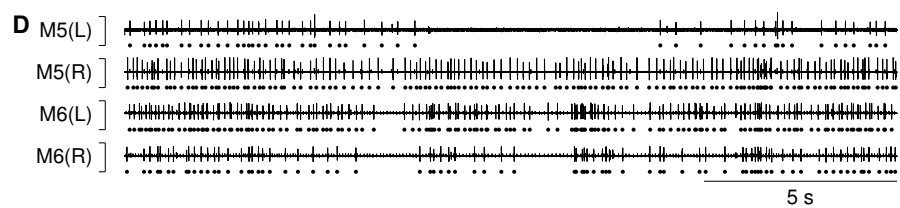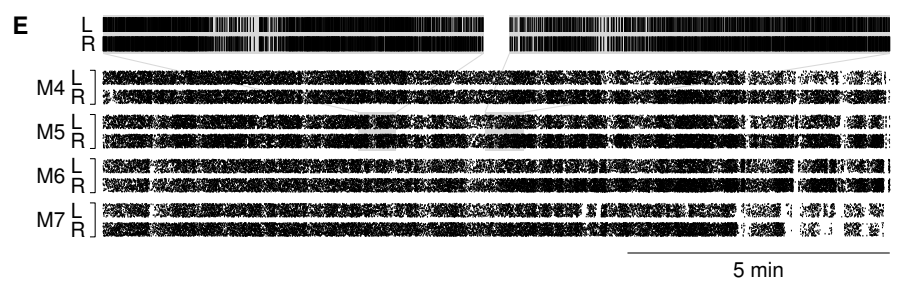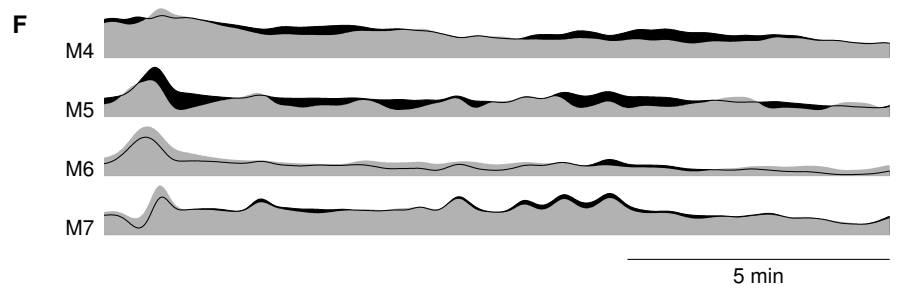

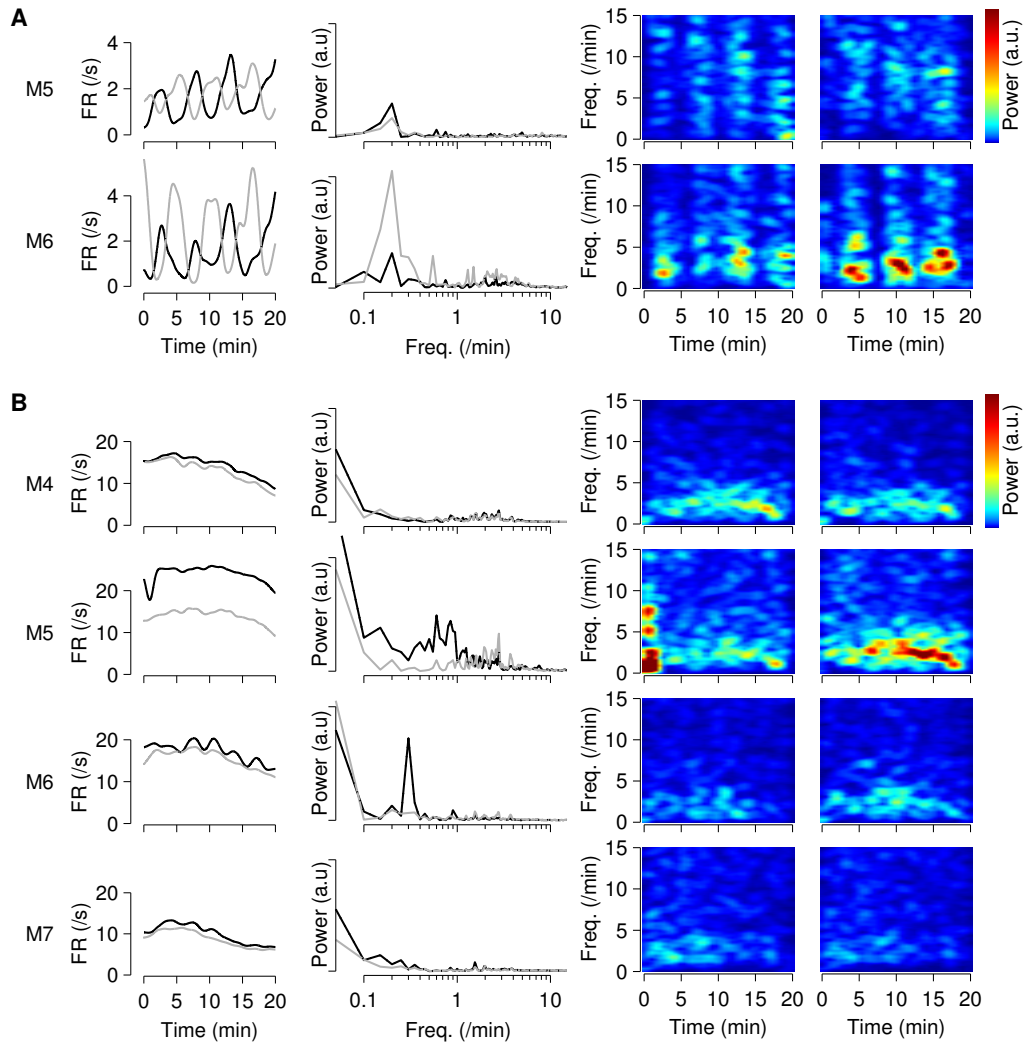

Supplement: NIHMS182518-supplement-01.pdf [file NIHMS182518-supplement-01.pdf]
